# Supplementary material
Source: publisher figshare collection journal article supplement (https://diabetesjournals.figshare.com/ndownloader/files/22335870)

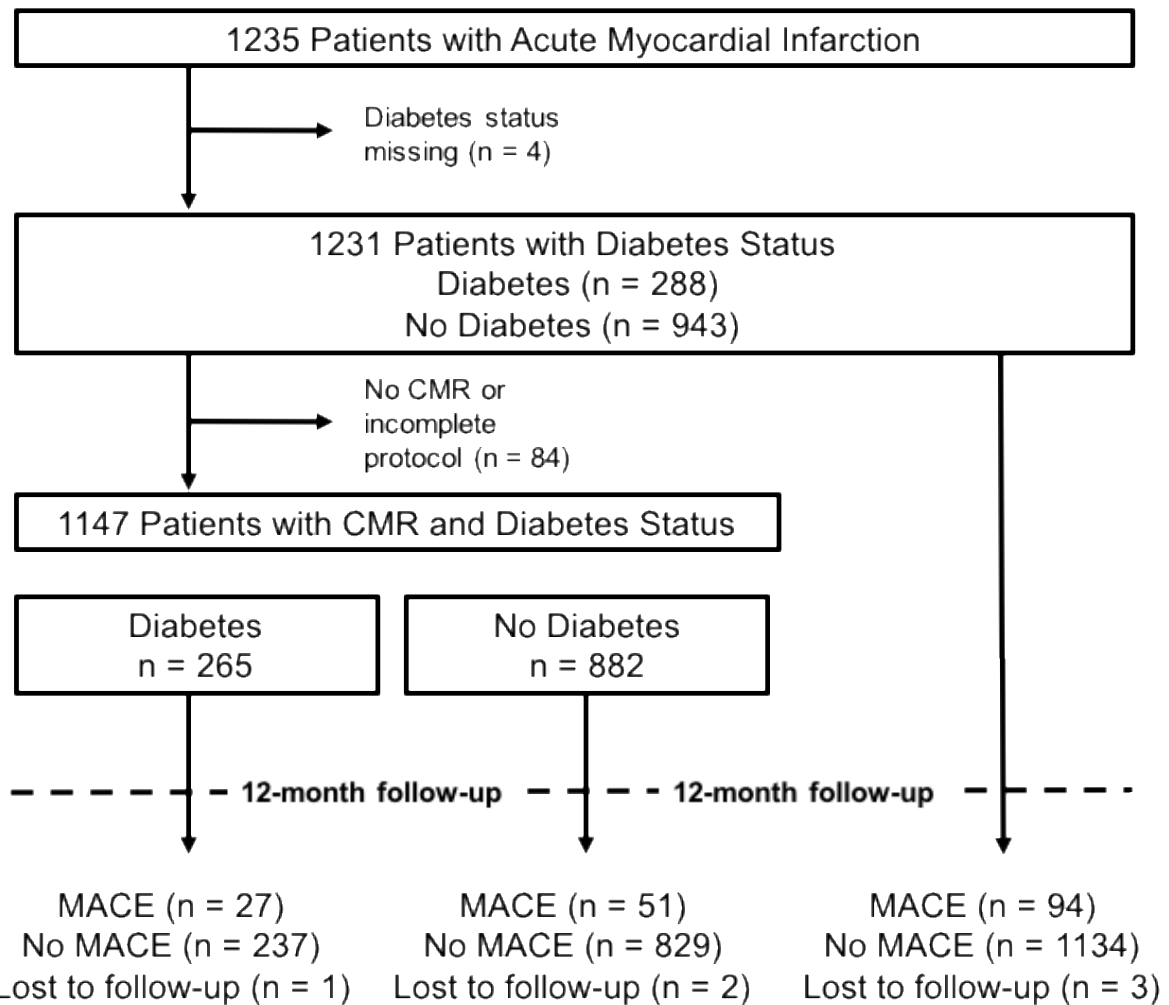

**Figure S1 Flow-Chart**

CMR = cardiac magnetic resonance

MACE = major adverse clinical events

Supplement: Supplementary file 1 [file 22335870]
